# Supplementary material for: Chronic Obstructive Pulmonary Disease Patients’ Acceptance in E-Health Clinical Trials
Source: MDPI journal article supplement (doi:10.3390/ijerph18105230), 2021-05-14
Supplement: s1 [file s1]

## Multimedia Appendix 5. TH Intervention characteristics of included studies.

| Authors                        | Settings                        | Intervention with TH                                    | Mode of delivery                    | Frequency and duration      | Control group treatment                   |
|--------------------------------|---------------------------------|---------------------------------------------------------|-------------------------------------|-----------------------------|-------------------------------------------|
| Antoniades et al., 2012 [1]    | Patient home                    | Online COPD Self-management education                   | Web-based                           | 1×/day for 12 months        | Usual care                                |
| Berkhof et al., 2015 [2]       | Medical centre & patient home   | Phone calls education and follow ups                    | Telephone                           | Call / 2 weeks for 6 months | Usual care                                |
| Calvo et al, 2014 [3]          | Patient home                    | Home care with TH                                       | Web-based and telephone             | 1×/day for 7 months         | Usual care                                |
| Cameron-Tucker et al.,2016 [4] | Medical centre & patient home   | Written home exercise with TH                           | Telephone                           | Call / 2 weeks for 2 weeks  | Usual care                                |
| Chau et al., 2012 [5]          | Patient home                    | Telecare services                                       | Web-base and telephone              | 3×/day for 2 menthes        | Community services                        |
| De San Miguel et al, 2013 [6]  | Patient home                    | Written COPD Self-management education                  | Telephone                           | 1×/day for 6 months         | Usual care                                |
| Dinesen et al 2012 [7]         | Patient home                    | Telerehabilitation                                      | Video calls                         | 1×/day for 4 months         | Instructional book                        |
| Farmer et al., 2017 [8]        | Patient home                    | COPD self-management education with TH                  | Web-based                           | 1×/day for 12 months        | COPD self-management education without TH |
| Halpin et al., 2011 [9]        | Patient home                    | Automated text messages system                          | Text message                        | 1×/day for 4 months         | NR                                        |
| Ho et al., 2016 [10]           | Patient home                    | Telemonitoring                                          | Web-based and telephone             | 1×/day for 2 months         | Usual care                                |
| Jakobsen et al., 2015 [11]     | Patient home                    | Virtual hospital                                        | NR                                  | 1×/day for 6 months         | Regular hospitalization                   |
| Koff et al., 2009 [12]         | Patient home                    | Online COPD Self-management education                   | Web-base and telephone              | 1×/day for 3 months         | Usual care                                |
| Lewis et al., 2011 [13]        | Patient home                    | Home monitoring                                         | telephone                           | 2×/day for 6 months         | Usual care                                |
| Lilholt et al., 2017 [14]      | Patient home & community centre | Telerehabilitation                                      | Web-based, and telephone            | NR                          | Usual rehabilitation                      |
| McDowell ,2015 [15]            | Patient home                    | Home-based health care                                  | Telephone                           | 1×/day for 6 months         | Usual care                                |
| Nield et al., 2012 [16]        | Patient home                    | Online COPD Self-management education                   | Video calls                         | 1×/week for 1 month         | Usual care and face -to-face education    |
| Pedone et al., 2013 [17]       | Patient home                    | Telemonitoring                                          | Web-based, telephone, and algorithm | 1× /day for 9 months        | Usual care                                |
| Pinnock et al., 2013 [18]      | Patient home                    | Online COPD Self-management education                   | Web-based, telephone, and algorithm | 1× /day for 12 months       | Usual care                                |
| Ringbeak et al., 2015 [19]     | Patient home                    | Online COPD Self-management education and home exercise | Video calls                         | 3× /week for 6 months       | Usual care                                |
| Ringbeak et al.,2016 [20]      | Patient home& outpatient        | Online COPD Self-management education and home exercise | Web-based, video calls              | NR                          | Usual PR                                  |
| Schou et al., 2013 [21]        | Patient home                    | NR                                                      | Video calls                         | 1× /day for 3 months        | Regular hospitalization.                  |
| Shany et al ,2017 [22]         | Patient home                    | Online COPD, Self-management education                  | Web-based and telephone             | 1× /day for 12 months       | Standard home care                        |

|                              |                  |                                                         |                           |                       |            |
|------------------------------|------------------|---------------------------------------------------------|---------------------------|-----------------------|------------|
| Stickland et al., 2011 [23]  | Community centre | Online COPD Self-management education                   | Web-based and video calls | 2x/ week              | Usual PR   |
| Tabak et al., 2014 [24]      | Patient home     | Online COPD Self-management education                   | Web-based and Video calls | 1x /day for 9 months  | Usual care |
| Trappenburg et al.,2008 [25] | Patient home     | Software COPD Self-management education                 | Telephone                 | 1x /day for 6 months  | Usual care |
| Tsai et al.,2017 [26]        | Patient home     | Online COPD Self-management education and home exercise | Video calls               | 3x/ week              | Usual PR   |
| Vianello et al., 2016 [27]   | Hospital         | Online COPD Self-management education                   | Web-based and telephone   | 1x /day for 12 months | Usual care |

**Abbreviations:** N: Number; x: Time (s); /: every; PR: Pulmonary rehabilitations; NR: Not reported.

## References

1. Antoniadou NC, Rochford PD, Pretto JJ, Pierce RJ, Gogler J, Steinkrug J, et al. Pilot study of remote telemonitoring in COPD. *TELEMEDICINE and e-HEALTH*. 2012;18(8):634-40.
2. Berkhof FF, van den Berg JW, Uil SM, Kerstjens HA. Telemedicine, the effect of nurse-initiated telephone follow up, on health status and health-care utilization in COPD patients: A randomized trial. *Respirology*. 2015;20(2):279-85.
3. Calvo GS, Gómez-Suárez C, Soriano J, Zamora E, González-Gamarra A, González-Béjar M, et al. A home telehealth program for patients with severe COPD: the PROMETE study. *Respiratory medicine*. 2014;108(3):453-62.
4. Cameron-Tucker HL, Wood-Baker R, Joseph L, Walters JA, Schüz N, Walters EH. A randomized controlled trial of telephone-mentoring with home-based walking preceding rehabilitation in COPD. *International journal of chronic obstructive pulmonary disease*. 2016;11:1991.
5. Chau JP-C, Lee DT-F, Yu DS-F, Chow AY-M, Yu W-C, Chair S-Y, et al. A feasibility study to investigate the acceptability and potential effectiveness of a telecare service for older people with chronic obstructive pulmonary disease. *International journal of medical informatics*. 2012;81(10):674-82.
6. De San Miguel K, Smith J, Lewin G. Telehealth remote monitoring for community-dwelling older adults with chronic obstructive pulmonary disease. *Telemedicine and e-Health*. 2013;19(9):652-7.
7. Dinesen B, Haesum LK, Soerensen N, Nielsen C, Grann O, Hejlesen O, et al. Using preventive home monitoring to reduce hospital admission rates and reduce costs: a case study of telehealth among chronic obstructive pulmonary disease patients. *Journal of telemedicine and telecare*. 2012;18(4):221-5.
8. Farmer A, Williams V, Velardo C, Shah SA, Yu L-M, Rutter H, et al. Self-management support using a digital health system compared with usual care for chronic obstructive pulmonary disease: randomized controlled trial. *Journal of medical Internet research*. 2017;19(5):e144.
9. Halpin DM, Laing-Morton T, Spedding S, Levy ML, Coyle P, Lewis J, et al. A randomised controlled trial of the effect of automated interactive calling combined with a health risk forecast on frequency and severity of exacerbations of COPD assessed clinically and using EXACT PRO. *Primary Care Respiratory Journal*. 2011;20(3):324-31.
10. Ho T-W, Huang C-T, Chiu H-C, Ruan S-Y, Tsai Y-J, Yu C-J, et al. Effectiveness of telemonitoring in patients with chronic obstructive pulmonary disease in Taiwan-A randomized controlled trial. *Scientific reports*. 2016;6:23797.
11. Jakobsen AS, Laursen LC, Rydahl-Hansen S, Østergaard B, Gerds TA, Emme C, et al. Home-based telehealth hospitalization for exacerbation of chronic obstructive pulmonary disease: findings from “the virtual hospital” trial. *Telemedicine and E-health*. 2015;21(5):364-73.

12. Koff P, Jones RH, Cashman JM, Voelkel NF, Vandivier R. Proactive integrated care improves quality of life in patients with COPD. *European Respiratory Journal*. 2009;33(5):1031-8.
13. Lewis KE, Annandale JA, Warm DL, Rees SE, Hurlin C, Blyth H, et al. Does home Telemonitoring after pulmonary rehabilitation reduce healthcare use in optimized COPD?? A pilot randomized trial. *COPD: Journal of Chronic Obstructive Pulmonary Disease*. 2011;7(1):44-50.
14. Lilholt PH, Udsen FW, Ehlers L, Hejlesen OK. Telehealthcare for patients suffering from chronic obstructive pulmonary disease: effects on health-related quality of life: results from the Danish 'TeleCare North' cluster-randomised trial. *BMJ open*. 2017;7(5):e014587.
15. McDowell JE, McClean S, FitzGibbon F, Tate S. A randomised clinical trial of the effectiveness of home-based health care with telemonitoring in patients with COPD. *Journal of telemedicine and telecare*. 2015;21(2):80-7.
16. Nield M, Hoo GWS. Real-time telehealth for COPD self-management using Skype™. *COPD: Journal of Chronic Obstructive Pulmonary Disease*. 2012;9(6):611-9.
17. Pedone C, Chiurco D, Scarlata S, Incalzi RA. Efficacy of multiparametric telemonitoring on respiratory outcomes in elderly people with COPD: a randomized controlled trial. *BMC health services research*. 2013;13(1):82.
18. Pinnock H, Hanley J, McCloughan L, Todd A, Krishan A, Lewis S, et al. Effectiveness of telemonitoring integrated into existing clinical services on hospital admission for exacerbation of chronic obstructive pulmonary disease: researcher blind, multicentre, randomised controlled trial. *Bmj*. 2013;347:f6070.
19. Ringbæk T, Green A, Laursen LC, Frausing E, Brøndum E, Ulrik CS. Effect of tele health care on exacerbations and hospital admissions in patients with chronic obstructive pulmonary disease: a randomized clinical trial. *International journal of chronic obstructive pulmonary disease*. 2015;10:1801.
20. Ringbaek TJ, Lavesen M, Lange P. Tablet computers to support outpatient pulmonary rehabilitation in patients with COPD. *European clinical respiratory journal*. 2016;3(1):31016.
21. Schou L, Østergaard B, Rydahl-Hansen S, Rasmussen LS, Emme C, Jakobsen AS, et al. A randomised trial of telemedicine-based treatment versus conventional hospitalisation in patients with severe COPD and exacerbation—effect on self-reported outcome. *Journal of telemedicine and telecare*. 2013;19(3):160-5.
22. Shany T, Hession M, Pryce D, Roberts M, Basilakis J, Redmond S, et al. A small-scale randomised controlled trial of home telemonitoring in patients with severe chronic obstructive pulmonary disease. *Journal of telemedicine and telecare*. 2017;23(7):650-6.
23. Stickland MK, Jourdain T, Wong EY, Rodgers WM, Jendzjowsky NG, MacDonald GF. Using Telehealth technology to deliver pulmonary rehabilitation to patients with chronic obstructive pulmonary disease. *Canadian respiratory journal*. 2011;18(4):216-20.
24. Tabak M, Brusse-Keizer M, van der Valk P, Hermens H, Vollenbroek-Hutten M. A telehealth program for self-management of COPD exacerbations and promotion of an active lifestyle: a pilot randomized controlled trial. *International journal of chronic obstructive pulmonary disease*. 2014;9:935.
25. Trappenburg JC, Niesink A, de Weert-van Oene GH, van der Zeijden H, van Snippenburg R, Peters A, et al. Effects of telemonitoring in patients with chronic obstructive pulmonary disease. *Telemedicine and e-Health*. 2008;14(2):138-46.
26. Tsai LLY, McNamara RJ, Moddel C, Alison JA, McKenzie DK, McKeough ZJ. Home-based telerehabilitation via real-time videoconferencing improves endurance exercise capacity in patients with COPD: The randomized controlled TeleR Study. *Respirology*. 2017;22(4):699-707.
27. Vianello A, Fusello M, Gubian L, Rinaldo C, Dario C, Concas A, et al. Home telemonitoring for patients with acute exacerbation of chronic obstructive pulmonary disease: a randomized controlled trial. *BMC pulmonary medicine*. 2016;16(1):157.
