# Supplementary material for: Chronic Obstructive Pulmonary Disease Patients’ Acceptance in E-Health Clinical Trials
Source: MDPI journal article supplement (doi:10.3390/ijerph18105230), 2021-05-14
Supplement: s1 [file s1]

#### Multimedia Appendix 4. Detailed description of TH interventions and parallel groups.

| Intervention                                    | Summary of interventions attached with TH                                                                                                                                                                                                | Control groups                                                                                   |
|-------------------------------------------------|------------------------------------------------------------------------------------------------------------------------------------------------------------------------------------------------------------------------------------------|--------------------------------------------------------------------------------------------------|
| Usual care with self-management education [1-7] | Regular clinic visits for follow-ups or home care visits for follow-ups with individualized self-management education provide using specific mobile apps (i.e., EDGE), living well with COPD website, booklet or face to face education. | Receiving the self-management materials (apps, booklet, and website) without TM.                 |
| Tele-rehabilitation program [8-17]              | Designed rehabilitation program packages to deliver at the patient home or the community centre. Health professional monitor, the patients, live or via video conference.                                                                | Designed rehabilitation program packages to deliver at the patient home or the community centre. |
| Home care [9, 14, 18, 19]                       | Patients receive regular home care included health professional's visits for follow-ups, education sessions, and treatment.                                                                                                              | Patient receiving the same without TM between visits.                                            |
| Virtual hospital [20, 21]                       | Patient transferred to home within 48 hours of admission to be remotely monitored by healthcare practitioners.                                                                                                                           | Regular hospitalization.                                                                         |

#### Reference

1. Antoniadou NC, Rochford PD, Pretto JJ, Pierce RJ, Gogler J, Steinkrug J, et al. Pilot study of remote telemonitoring in COPD. *TELEMEDICINE and e-HEALTH*. 2012;18(8):634-40.
2. Berkhof FF, van den Berg JW, Uil SM, Kerstjens HA. Telemedicine, the effect of nurse-initiated telephone follow up, on health status and health-care utilization in COPD patients: A randomized trial. *Respirology*. 2015;20(2):279-85.
3. Calvo GS, Gómez-Suárez C, Soriano J, Zamora E, González-Gamarra A, González-Béjar M, et al. A home telehealth program for patients with severe COPD: the PROMETE study. *Respiratory medicine*. 2014;108(3):453-62.
4. Cameron-Tucker HL, Wood-Baker R, Joseph L, Walters JA, Schüz N, Walters EH. A randomized controlled trial of telephone-mentoring with home-based walking preceding rehabilitation in COPD. *International journal of chronic obstructive pulmonary disease*. 2016;11:1991.

5. Chau JP-C, Lee DT-F, Yu DS-F, Chow AY-M, Yu W-C, Chair S-Y, et al. A feasibility study to investigate the acceptability and potential effectiveness of a telecare service for older people with chronic obstructive pulmonary disease. *International journal of medical informatics*. 2012;81(10):674-82.
6. De San Miguel K, Smith J, Lewin G. Telehealth remote monitoring for community-dwelling older adults with chronic obstructive pulmonary disease. *Telemedicine and e-Health*. 2013;19(9):652-7.
7. Dinesen B, Haesum LK, Soerensen N, Nielsen C, Grann O, Hejlesen O, et al. Using preventive home monitoring to reduce hospital admission rates and reduce costs: a case study of telehealth among chronic obstructive pulmonary disease patients. *Journal of telemedicine and telecare*. 2012;18(4):221-5.
8. Farmer A, Williams V, Velardo C, Shah SA, Yu L-M, Rutter H, et al. Self-management support using a digital health system compared with usual care for chronic obstructive pulmonary disease: randomized controlled trial. *Journal of medical Internet research*. 2017;19(5):e144.
9. Halpin DM, Laing-Morton T, Spedding S, Levy ML, Coyle P, Lewis J, et al. A randomised controlled trial of the effect of automated interactive calling combined with a health risk forecast on frequency and severity of exacerbations of COPD assessed clinically and using EXACT PRO. *Primary Care Respiratory Journal*. 2011;20(3):324-31.
10. Ho T-W, Huang C-T, Chiu H-C, Ruan S-Y, Tsai Y-J, Yu C-J, et al. Effectiveness of telemonitoring in patients with chronic obstructive pulmonary disease in Taiwan-A randomized controlled trial. *Scientific reports*. 2016;6:23797.
11. Koff P, Jones RH, Cashman JM, Voelkel NF, Vandivier R. Proactive integrated care improves quality of life in patients with COPD. *European Respiratory Journal*. 2009;33(5):1031-8.
12. Lewis KE, Annandale JA, Warm DL, Rees SE, Hurlin C, Blyth H, et al. Does home Telemonitoring after pulmonary rehabilitation reduce healthcare use in optimized COPD?? A pilot randomized trial. *COPD: Journal of Chronic Obstructive Pulmonary Disease*. 2011;7(1):44-50.
13. Lilholt PH, Udsen FW, Ehlers L, Hejlesen OK. Telehealthcare for patients suffering from chronic obstructive pulmonary disease: effects on health-related quality of life: results from the Danish 'TeleCare North' cluster-randomised trial. *BMJ open*. 2017;7(5):e014587.
14. Pedone C, Chiurco D, Scarlata S, Incalzi RA. Efficacy of multiparametric telemonitoring on respiratory outcomes in elderly people with COPD: a randomized controlled trial. *BMC health services research*. 2013;13(1):82.
15. Ringbaek TJ, Lavesen M, Lange P. Tablet computers to support outpatient pulmonary rehabilitation in patients with COPD. *European clinical respiratory journal*. 2016;3(1):31016.
16. Stickland MK, Jourdain T, Wong EY, Rodgers WM, Jendzjowsky NG, MacDonald GF. Using Telehealth technology to deliver pulmonary rehabilitation to patients with chronic obstructive pulmonary disease. *Canadian respiratory journal*. 2011;18(4):216-20.
17. Tsai LLY, McNamara RJ, Moddel C, Alison JA, McKenzie DK, McKeough ZJ. Home-based telerehabilitation via real-time videoconferencing improves endurance exercise capacity in patients with COPD: The randomized controlled TeleR Study. *Respirology*. 2017;22(4):699-707.
18. McDowell JE, McClean S, FitzGibbon F, Tate S. A randomised clinical trial of the effectiveness of home-based health care with telemonitoring in patients with COPD. *Journal of telemedicine and telecare*. 2015;21(2):80-7.
19. Nield M, Hoo GWS. Real-time telehealth for COPD self-management using Skype™. *COPD: Journal of Chronic Obstructive Pulmonary Disease*. 2012;9(6):611-9.
20. Jakobsen AS, Laursen LC, Rydahl-Hansen S, Østergaard B, Gerds TA, Emme C, et al. Home-based telehealth hospitalization for exacerbation of chronic obstructive pulmonary disease: findings from "the virtual hospital" trial. *Telemedicine and E-health*. 2015;21(5):364-73.
21. Schou L, Østergaard B, Rydahl-Hansen S, Rasmussen LS, Emme C, Jakobsen AS, et al. A randomised trial of telemedicine-based treatment versus conventional hospitalisation in patients

with severe COPD and exacerbation—effect on self-reported outcome. *Journal of telemedicine and telecare*. 2013;19(3):160-5.
