# Supplementary material for: Chronic Obstructive Pulmonary Disease Patients’ Acceptance in E-Health Clinical Trials
Source: MDPI journal article supplement (doi:10.3390/ijerph18105230), 2021-05-14

Multimedia Appendix 2. More information about statistical methods for acceptance and dropout rates.

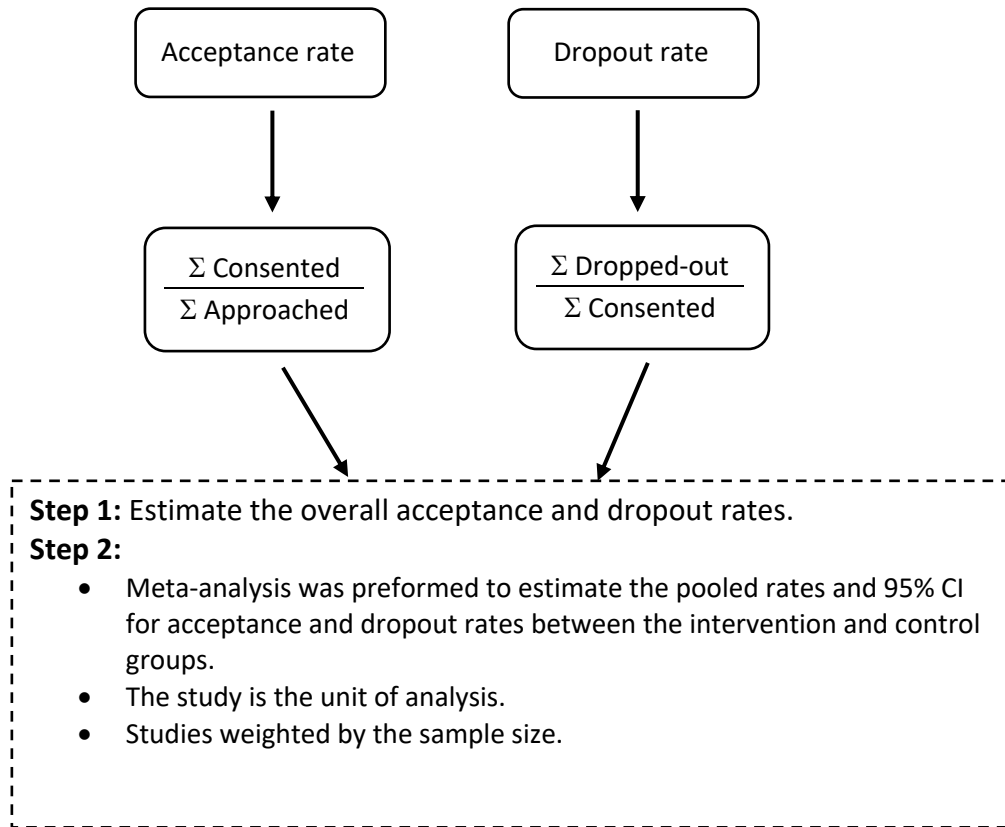

Supplement: s1 [file s1]
