# Supplementary material for: Chronic Obstructive Pulmonary Disease Patients’ Acceptance in E-Health Clinical Trials
Source: MDPI journal article supplement (doi:10.3390/ijerph18105230), 2021-05-14
Supplement: s1 [file s1]

Multimedia Appendix 10. Assessment risk of bias for included studies.

[illegible]
