# Supplementary material for: Chronic Obstructive Pulmonary Disease Patients’ Acceptance in E-Health Clinical Trials
Source: MDPI journal article supplement (doi:10.3390/ijerph18105230), 2021-05-14
Supplement: s1 [file s1]

## Multimedia Appendix 1. Search strategies of databases

### Ovid MEDLINE - up to January 2021

|                                                                                                                                               |
|-----------------------------------------------------------------------------------------------------------------------------------------------|
| 1. Pulmonary Disease, Chronic Obstructive/ or Lung diseases, obstructive/ or Obstructive airway disease/ or Chronic obstructive lung disease/ |
| 2. Emphysema/ or Pulmonary Emphysema/ or Bronchitis, Chronic/ or Bronchitis/                                                                  |
| 3. Chronic Obstructive Pulmonary* Disease*.mp.                                                                                                |
| 4. Chronic Obstructive lung* disease*.mp.                                                                                                     |
| 5. (COPD or COAD or chronic bronchi* or emphysema* or hyperlucent lung*).mp.                                                                  |
| 6. or/1-5                                                                                                                                     |
| 7. telehealth* tele-health*.mp.                                                                                                               |
| 8. telecare* tele-care*.mp.                                                                                                                   |
| 9. telemonitoring* tele-monitoring*.mp.                                                                                                       |
| 10.telerehabilitation* tele-rehabilitation*.mp.                                                                                               |
| 11.telemedicine* tele-medicine*.mp.                                                                                                           |
| 12.home monitoring*.mp.                                                                                                                       |
| 13.digital monitoring*.mp.                                                                                                                    |
| 14.web-based intervention*.mp.                                                                                                                |
| 15.internet-based monitoring*.mp.                                                                                                             |
| 16.ehealth or Ehealth or e-health*.mp.                                                                                                        |
| 17.or/7-16                                                                                                                                    |
| 18.6 and 17                                                                                                                                   |
| 19.limit 18 to (english language and humans)                                                                                                  |

### EMBASE – up to January 2021

|                                                                                                                                               |
|-----------------------------------------------------------------------------------------------------------------------------------------------|
| 1. Pulmonary Disease, Chronic Obstructive/ or Lung diseases, obstructive/ or Obstructive airway disease/ or Chronic obstructive lung disease/ |
| 2. Emphysema/ or Pulmonary Emphysema/ or Bronchitis, Chronic/ or Bronchitis/                                                                  |
| 3. Chronic Obstructive Pulmonary* Disease*.mp.                                                                                                |
| 4. Chronic Obstructive lung* disease*.mp.                                                                                                     |
| 5. (COPD or COAD or chronic bronchi* or emphysema* or hyperlucent lung*).mp.                                                                  |
| 6. or/1-5                                                                                                                                     |
| 7. telehealth* tele-health*.mp.                                                                                                               |
| 8. telecare* tele-care*.mp.                                                                                                                   |

|                                                 |
|-------------------------------------------------|
| 9. telemonitoring* tele-monitoring*.mp.         |
| 10.telerehabilitation* tele-rehabilitation*.mp. |
| 11.telemedicine* tele-medicine*.mp.             |
| 12.home monitoring*.mp.                         |
| 13.digital monitoring*.mp.                      |
| 14.web-based intervention*.mp.                  |
| 15.internet-based monitoring*.mp.               |
| 16.ehealth or Ehealth or e-health*.mp.          |
| 17.or/7-16                                      |
| 18.6 and 17                                     |
| 19.limit 18 to (english language and humans)    |

#### **CINAHL (EBSCO) - up to January 2021**

|                                                                                       |
|---------------------------------------------------------------------------------------|
| 1. (MM "Lung Diseases, Obstructive") OR (MM "Pulmonary Disease, Chronic Obstructive") |
| 2. (MM "Emphysema") OR (MM "Bronchitis, Chronic") OR (MM "Bronchitis")                |
| 3. S1 OR S2                                                                           |
| 4. (TX "telehealth*") OR (MM" tele-health")                                           |
| 5. (TM" telecare") OR (MM" tele-care")                                                |
| 6. (TX" telehomecare*") OR (MM" tele-homecare")                                       |
| 7. (TX" telerehabilitation") OR (MM" tele-rehabilitation")                            |
| 8. (TM" telemedicine*") OR (MM" tele-medicine")                                       |
| 9. (TX" home monitoring*")                                                            |
| 10. (TX" digital monitoring*")                                                        |
| 11. (TX" web-based interventions*") OR (MM" internet-based interventions")            |
| 12. (TX" Ehealth*") OR (MM" e-health*") OR (MM" ehealth*")                            |
| 13. S4 OR S5 OR S6 OR S7 OR S8 OR S9 OR S10 OR S11 OR S11 OR S12                      |
| 14. S3 AND S13                                                                        |
| 15. Limit S14 to Language: English                                                    |

## **Cochrane Database of Systematic Reviews – up to January 2021**

| ID  | Search                                                     |
|-----|------------------------------------------------------------|
| #1  | (telehealth):ti,ab,kw (Word variations have been searched) |
| #2  | telecare                                                   |
| #3  | telehomecare                                               |
| #4  | telerehabilitation                                         |
| #5  | telemedicine                                               |
| #6  | home monitoring                                            |
| #7  | digital monitoring                                         |
| #8  | web-based intervention                                     |
| #9  | internet-based monitoring                                  |
| #10 | E-health                                                   |
| #11 | #1 or #2 or #3 or #4 or #5 or #6 or #7 or #8 or #9 or #10  |
| #12 | Chronic Obstructive Pulmonary Disease                      |
| #13 | Chronic Obstructive lung disease                           |
| #14 | COPD                                                       |
| #15 | #12 or #13 or #14                                          |
| #16 | #15 and #16                                                |

## **PubMed – up to January 2021**

1. "telemedicine"[MeSH Terms] OR "telemedicine"[All Fields] OR "telehealth"[All Fields]
2. telecare[All Fields]
3. telehomecare[All Fields]
4. "telerehabilitation"[MeSH Terms] OR "telerehabilitation"[All Fields]
5. "telemedicine"[MeSH Terms] OR "telemedicine"[All Fields]
6. home[All Fields] AND monitoring[All Fields]

7. digital[All Fields] AND monitoring[All Fields]
8. "internet-based intervention"[MeSH Terms] OR ("internet-based"[All Fields] AND "intervention"[All Fields]) OR "internet-based intervention"[All Fields] OR ("web"[All Fields] AND "based"[All Fields] AND "intervention"[All Fields]) OR "web based intervention"[All Fields]
9. E-health [All Fields]
10. "pulmonary disease, chronic obstructive"[MeSH Terms] OR ("pulmonary"[All Fields] AND "disease"[All Fields] AND "chronic"[All Fields] AND "obstructive"[All Fields]) OR "chronic obstructive pulmonary disease"[All Fields] OR ("chronic"[All Fields] AND "obstructive"[All Fields] AND "pulmonary"[All Fields] AND "disease"[All Fields])
11. "pulmonary disease, chronic obstructive"[MeSH Terms] OR ("pulmonary"[All Fields] AND "disease"[All Fields] AND "chronic"[All Fields] AND "obstructive"[All Fields]) OR "chronic obstructive pulmonary disease"[All Fields] OR ("chronic"[All Fields] AND "obstructive"[All Fields] AND "lung"[All Fields] AND "disease"[All Fields]) OR "chronic obstructive lung disease"[All Fields]
12. "pulmonary disease, chronic obstructive"[MeSH Terms] OR ("pulmonary"[All Fields] AND "disease"[All Fields] AND "chronic"[All Fields] AND "obstructive"[All Fields]) OR "chronic obstructive pulmonary disease"[All Fields] OR "copd"[All Fields]

## **Web of sciences – up to January 2021**

1. TOPIC: (telehealth)  
Indexes=SCI-EXPANDED, SSCI, A&HCI, CPCI-S, CPCI-SSH, ESCI Timespan=All years
2. TOPIC: (telecare)  
Indexes=SCI-EXPANDED, SSCI, A&HCI, CPCI-S, CPCI-SSH, ESCI Timespan=All years
3. TOPIC: (telehomecare)  
Indexes=SCI-EXPANDED, SSCI, A&HCI, CPCI-S, CPCI-SSH, ESCI Timespan=All years
4. TOPIC: (telerehabilitation)  
Indexes=SCI-EXPANDED, SSCI, A&HCI, CPCI-S, CPCI-SSH, ESCI Timespan=All years
5. TOPIC: (telemedicine)  
Indexes=SCI-EXPANDED, SSCI, A&HCI, CPCI-S, CPCI-SSH, ESCI Timespan=All years
6. TOPIC: (home monitoring)  
Indexes=SCI-EXPANDED, SSCI, A&HCI, CPCI-S, CPCI-SSH, ESCI Timespan=All years
7. TOPIC: (digital monitoring)  
Indexes=SCI-EXPANDED, SSCI, A&HCI, CPCI-S, CPCI-SSH, ESCI Timespan=All years
8. TOPIC: (web-based intervention)  
Indexes=SCI-EXPANDED, SSCI, A&HCI, CPCI-S, CPCI-SSH, ESCI Timespan=All years
9. TOPIC: (internet-based monitoring)  
Indexes=SCI-EXPANDED, SSCI, A&HCI, CPCI-S, CPCI-SSH, ESCI Timespan=All years
10. TOPIC: (E-health)

Indexes=SCI-EXPANDED, SSCI, A&HCI, CPCI-S, CPCI-SSH, ESCI Timespan=All years

11. #10 OR #9 OR #8 OR #7 OR #6 OR #5 OR #4 OR #3 OR #2 OR #1

Indexes=SCI-EXPANDED, SSCI, A&HCI, CPCI-S, CPCI-SSH, ESCI Timespan=All years

12. TOPIC: (Chronic Obstructive Pulmonary Disease)

Indexes=SCI-EXPANDED, SSCI, A&HCI, CPCI-S, CPCI-SSH, ESCI Timespan=All years

13. TOPIC: (Chronic Obstructive lung disease)

Indexes=SCI-EXPANDED, SSCI, A&HCI, CPCI-S, CPCI-SSH, ESCI Timespan=All years

14. TOPIC: (COPD)

Indexes=SCI-EXPANDED, SSCI, A&HCI, CPCI-S, CPCI-SSH, ESCI Timespan=All years

15. #14 OR #13 OR #12

Indexes=SCI-EXPANDED, SSCI, A&HCI, CPCI-S, CPCI-SSH, ESCI Timespan=All years

16. #15 AND #11

Indexes=SCI-EXPANDED, SSCI, A&HCI, CPCI-S, CPCI-SSH, ESCI Timespan=All years
