# Supplementary material for: Chronic Obstructive Pulmonary Disease Patients’ Acceptance in E-Health Clinical Trials
Source: Int J Environ Res Public Health. 2021 May 14;18(10):5230. doi: 10.3390/ijerph18105230 (PMC8156037; doi:10.3390/ijerph18105230)
Supplement: Supplementary file 1 [file ijerph-18-05230-s001.zip]

Archive with 10 entries (10 files):
- Supplementary File S1.pdf
- Supplementary File S10.pdf
- Supplementary File S2.pdf
- Supplementary File S3.pdf
- Supplementary File S4.pdf
- Supplementary File S5.pdf
- Supplementary File S6.pdf
- Supplementary File S7.pdf
- Supplementary File S8.pdf
- Supplementary File S9.pdf
