# Supplementary figures and images for: Chronic Obstructive Pulmonary Disease Patients’ Acceptance in E-Health Clinical Trials
Source: MDPI journal article supplement (doi:10.3390/ijerph18105230), 2021-05-14

## Multimedia Appendix 9. Forest plot of dropout rat in controls.

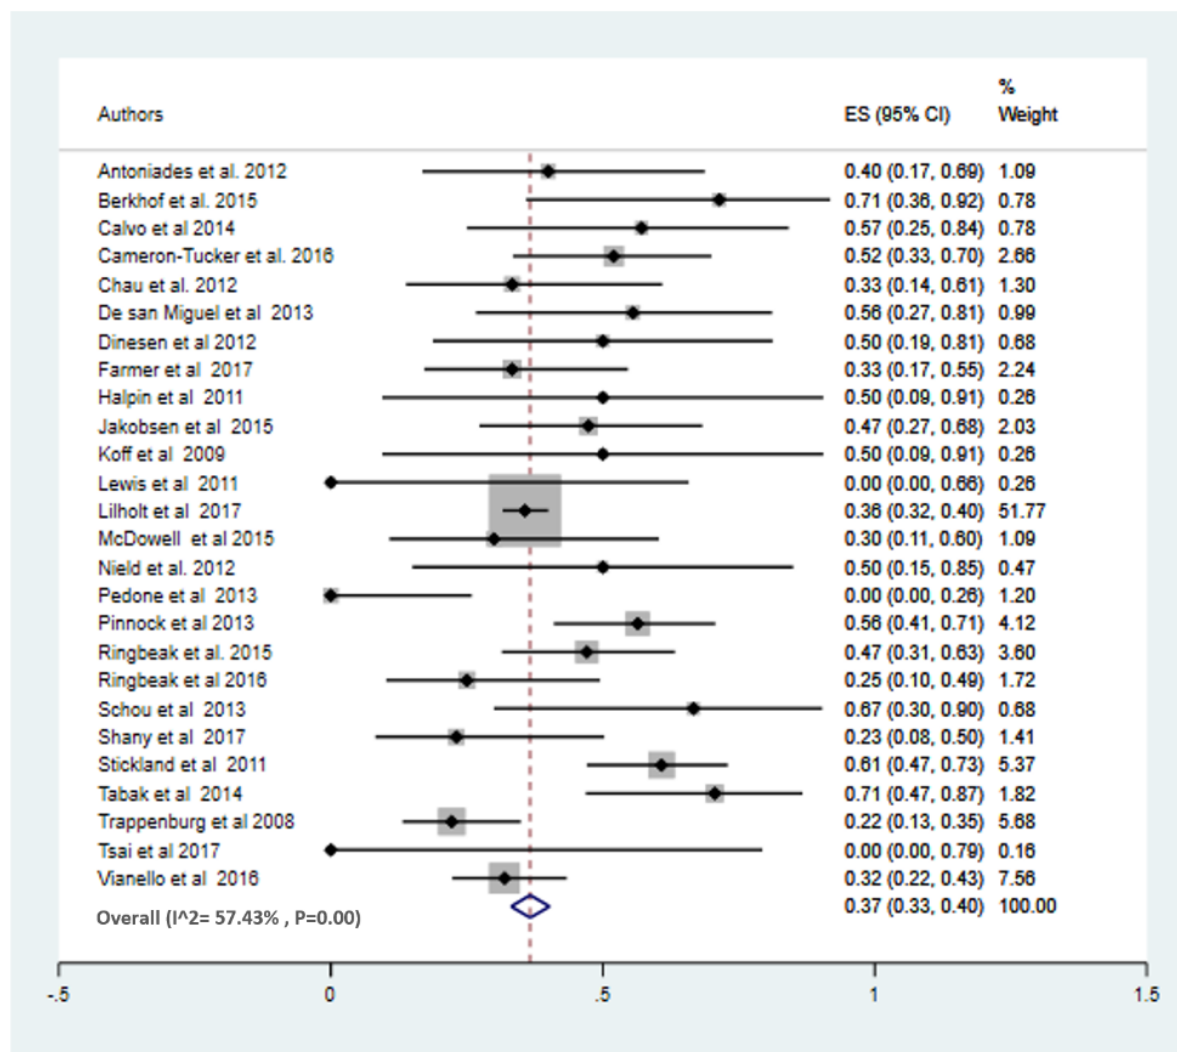

Supplement: s1 [file s1]

## Multimedia Appendix 8. Forest plot of acceptance rate in controls

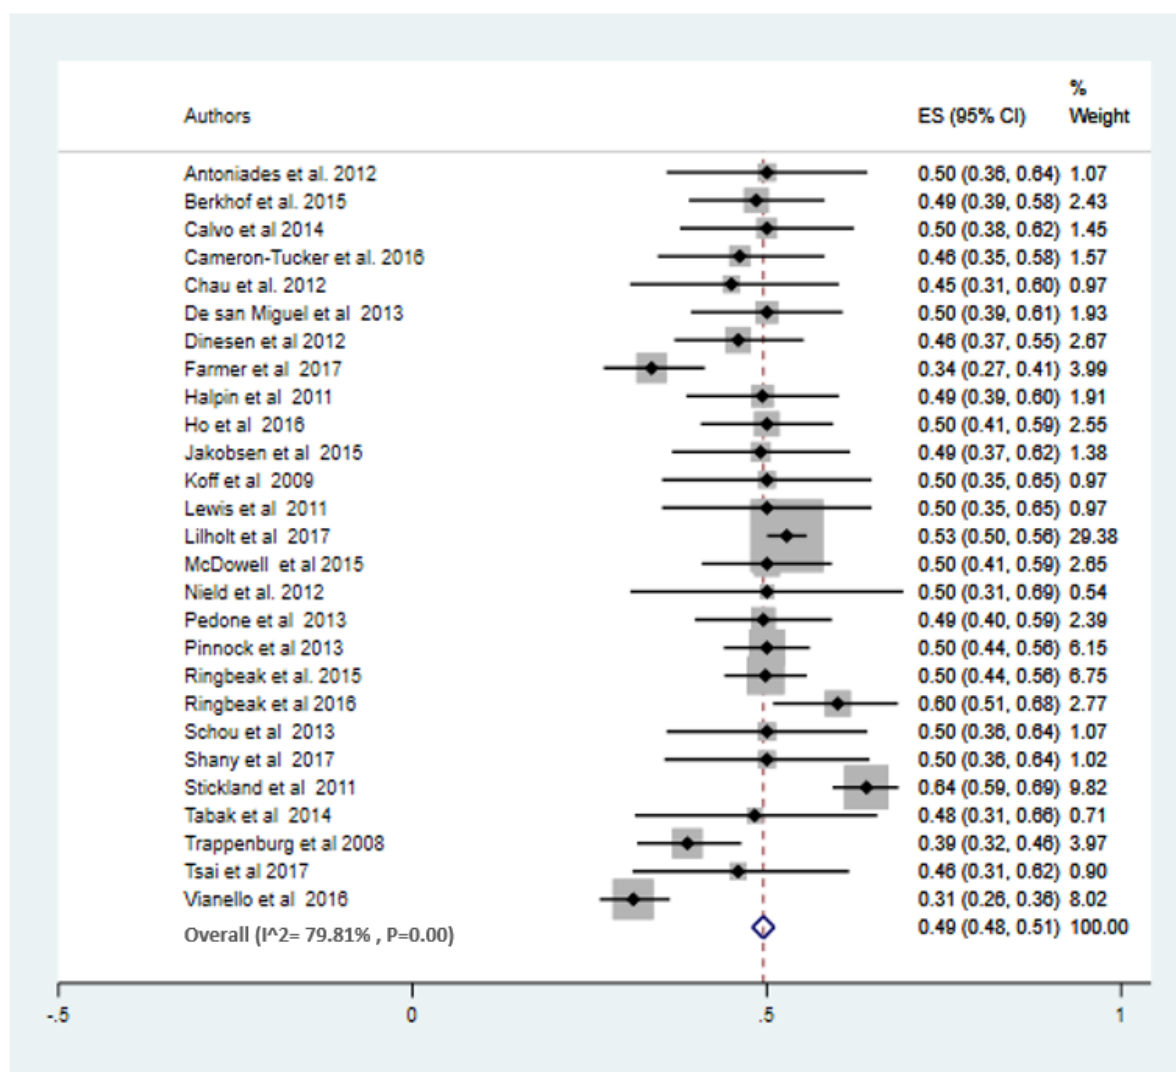

Supplement: s1 [file s1]

## Multimedia Appendix 7: Forest plot of dropout rate in TH intervention.

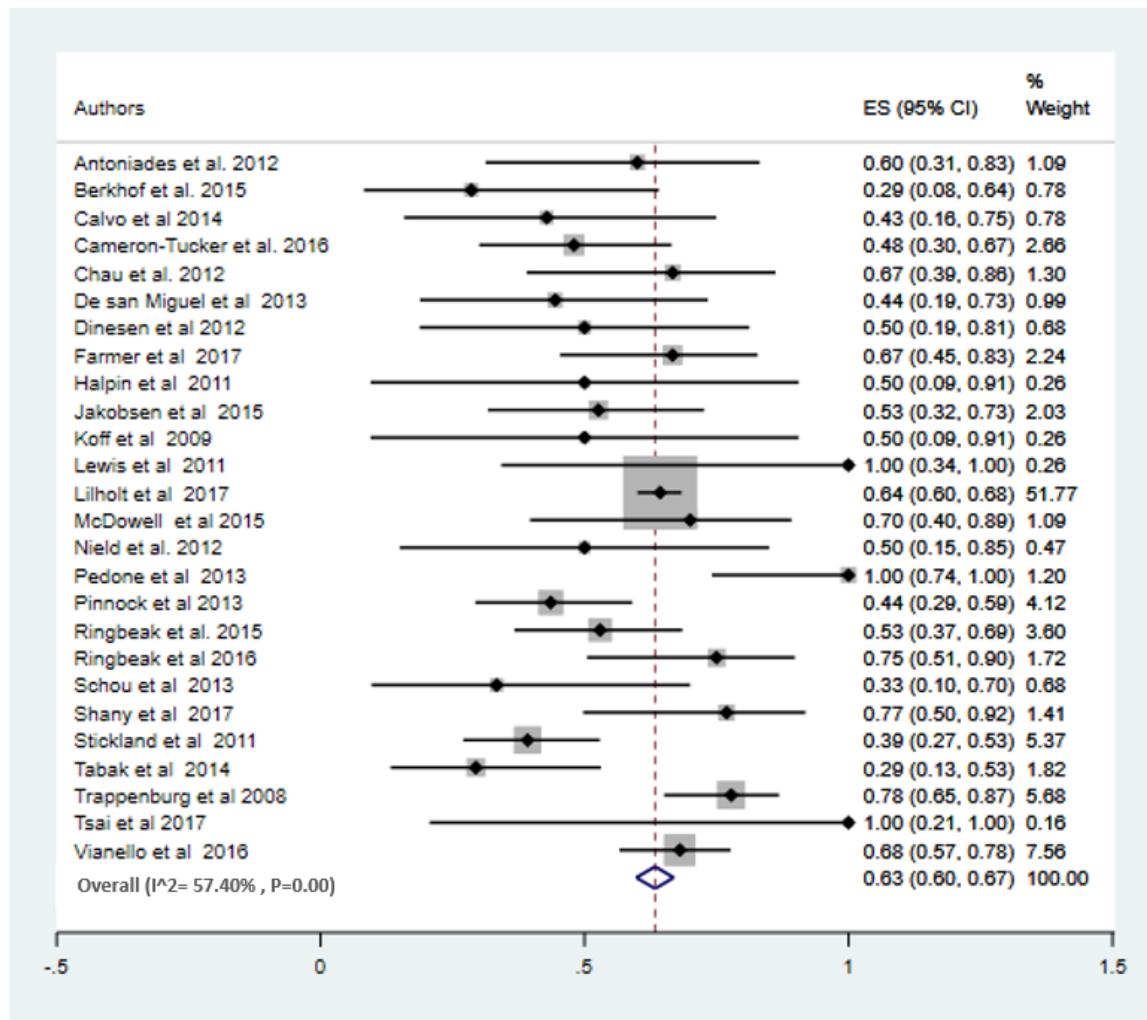

Supplement: s1 [file s1]

## Multimedia Appendix 6. Forest plot of acceptance rate in TH intervention.

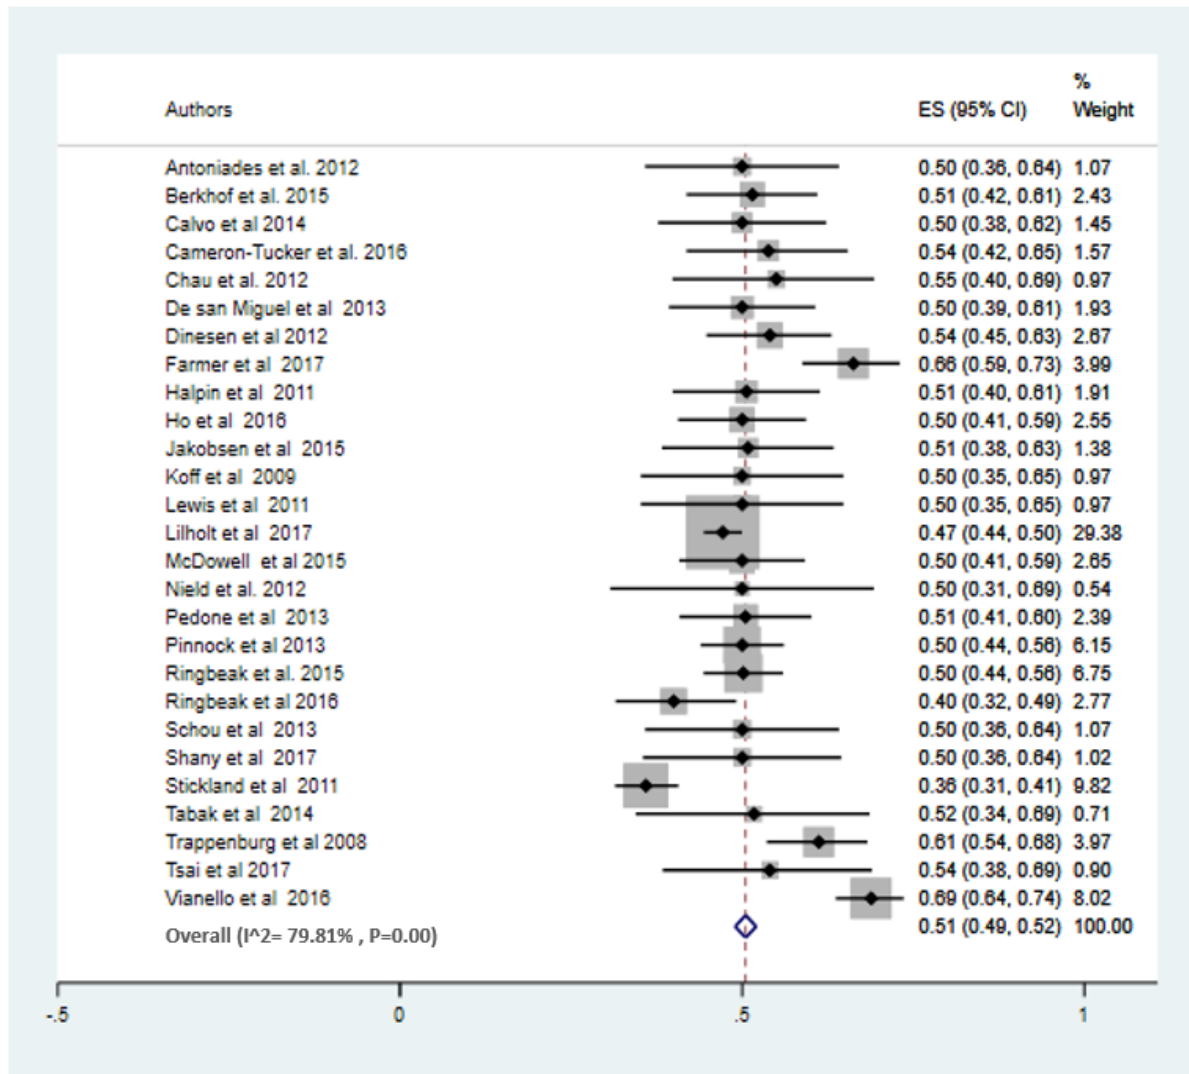

Supplement: s1 [file s1]
